# Supplementary material
Source: HighWire-hosted journal article supplement (https://heart.bmj.com/content/105/3/252)
Supplement: inline-supplementary-material-1 [file inline-supplementary-material-1.docx]

**KEY REFERENCES: heartjnl-2018-313103.R1 - Cardiac transplantation - indications, eligibility and current outcomes**

Lund LH, Khush KK, Cherikh WS, et al. The Registry of the International Society for Heart and Lung Transplantation: Thirty-fourth Adult Heart Transplantation Report-2017; Focus Theme: Allograft ischemic time. *J Heart Lung Transplant* 2017;**36**:1037-46.

Mehra MR, Canter CE, Hannan MM, et al. The 2016 International Society for Heart Lung Transplantation listing criteria for heart transplantation: A 10-year update. *J Heart Lung Transplant* 2016;**35**:1-23.

Banner NR, Bonser RS, Clark AL, et al. UK guidelines for referral and assessment of adults for heart transplantation. *Heart* 2011;**97**:1520-7.

Lindenfeld J, Miller GG, Shakar SF, et al. Drug therapy in the heart transplant recipient: part II: immunosuppressive drugs. *Circulation* 2004;**110**:3858-65.

Stewart S, Winters GL, Fishbein MC, et al. Revision of the 1990 working formulation for the standardization of nomenclature in the diagnosis of heart rejection. *J Heart Lung Transplant* 2005;**24**:1710-20.

Costanzo MR, Dipchand A, Starling R, et al. The International Society of Heart and Lung Transplantation Guidelines for the care of heart transplant recipients. *J Heart Lung Transplant* 2010;**29**:914-56.
